# Supplementary material
Source: publisher site journal article supplement (https://www.dovepress.com/article/606364)
Supplement: Supplementary file 1 [file 606364%20Revised%20Supplemental%20Material%201.docx]

**Hospital management**

Thank you for taking the time to speak with me and agreeing to participate in this study.

My name is Elisio Pereira and I am a physiotherapist and academic in cardiorespiratory physiotherapy.

This study is about a subacute cardiorespiratory physiotherapy home care service. The aim of this study is to identify the needs of health care providers prior to potential physiotherapy involvement in a hospital at home service for people with cardiorespiratory medical and post-surgical conditions. Therefore, we are hoping to gain your thoughts about that.

All your responses will be confidential i.e. your name will not be linked. Also, I would like to record our conversation for analysis in later stage if you are alright with that. I expect our conversation to take about 30 minutes.

Do you have any questions before we proceed?

Overview

I understand that the My Home Hospital (MHH) service has been running for three and a half years providing hospital-level of care for public patients from across Adelaide and some other regional areas.

Could you please tell me a bit about the current MHH service?

How do you anticipate the proposed physiotherapy home-hospital service to be incorporated into the current MHH service?

- How do you anticipate the collaboration between the physiotherapy team and management staff to be?
- How do you anticipate the billing/ funding for the service to be?

Physiotherapists and other health professionals

What are your thoughts about the planned role(s) of physiotherapists in the proposed service?

- What specific services would be provided by physiotherapists?
- What clinical conditions/ client types are likely to be involved?
- What skill sets do you anticipate the physiotherapists to have in taking up this role? (e.g. specific clinical skills, communication skills, technology, collaboration)
- Will the hospital arrange any training for the physiotherapists who will take part in the proposed service? If yes, how do you anticipate the training to be?

What do you see as being the benefits of having physiotherapists from private practice involved?

What concerns do you have about having physiotherapists from private practice involved?

- What do you not want to see?

Continuity of care

How do you anticipate continuity of care to be maintained from hospital to home?

- How do you anticipate the physiotherapist team to coordinate with nurses or administrative staff of the service?
- How do you anticipate the communication between team members of the service to be streamlined? (appointment time, logistics and medical records)
- What are the anticipated escalation and transfer protocol/ pathways for physiotherapists in case of patients with deteriorating conditions?
- How do you anticipate discharge planning to be coordinated and conducted? (scope, roles and responsibilities, support for CALD clients)

Any other comments

Is there anything else you think is important to consider in the preparation for physiotherapy involvement in a hospital at home service for people with cardiorespiratory medical and post-surgical conditions?

**Physiotherapists at the private practice**

Thank you for taking the time to speak with me and agreeing to participate in this study.

My name is Elisio Pereira and I am a physiotherapist and academic in cardiorespiratory physiotherapy.

team includes Dr. Elisio Alves Pereira Neto, Dr Kylie Johnston and Mr Grant Taylor.

This study is about a subacute cardiorespiratory physiotherapy home care service. The aim of this study is to identify the needs of health care providers prior to potential physiotherapy involvement in a hospital at home service for people with cardiorespiratory medical and post-surgical conditions. Therefore, we are hoping to gain your thoughts about that.

All your responses will be confidential i.e. your name will not be linked. Also, I would like to record our conversation for analysis in later stage if you are alright with that. I expect our conversation to take about 30 minutes.

Do you have any questions before we proceed?

I understand that you have been involved in home visits for people with orthopaedic conditions upon hospital stays at Calvary currently. They also deliver another home-care service, namely My Home Hospital. The service provides hospital-level of care for conditions including infections requiring IV antibiotics (eg cellulitis, pneumonia, mastitis), exacerbation of respiratory conditions, Deep vein thrombosis (DVT) and pulmonary embolism (PE), heart failure, post-operative care and other conditions for which home based hospital care is safe and appropriate. They are interested in expanding the physiotherapy involvement in this service.

What is your current involvement with the My Home Hospital referrals?

What do you see as advantages/ benefits of expanding physiotherapy involvement in home hospital service (HHS) for these client groups?

What are the challenges for physiotherapy involvement in home hospital service for these client groups?

Providing service for these client groups may require skills out of the musculoskeletal scope.

Personal

What do you think about your personal clinical expertise readiness in providing HHS?

- In terms of clinical knowledge and skills
- In terms of practical skills
- In terms of experience
- In terms of communication advocacy, decision-making and collaboration/ goal setting skills
- In terms of handling emergency situations
- In terms of managing multimorbidity/high acuity conditions and service connections for discharge planning

For any of the above responses – If a gap is identified:

Do you have any thoughts or preferences about what would help you and others prepare? (e.g. work shadowing in the hospital, online/ in-person training, clinical protocols and pathways, clear lines of communication about clinical issues, outcome measures, daily/ weekly meetings/ “ward rounds”, equipment)

What do you think about such potential shift in your role (i.e. engaging in wider field of physiotherapy other than musculoskeletal field)?

- Aspirations
- Concerns (career prospect)

What practical concerns do you have about providing HHS in the future?

- In terms of patient load/ workflow/ continuity of care for a patient across an episode of care
- In terms of time management
- In terms of travel logistics/ access to vehicles/ salary for travel time
- In terms of equipment and supplies
- In terms of documentation and information management/ confidentiality
- In terms of clinical care governance, scope and responsibilities
- In terms of safety and suitability of clients/ home environments

What other questions or concerns do you have about providing HHS in the future?

- Cultural sensitivity
- Communication within the care team regarding clinical care (nursing/ medical)
- Remote monitoring/ access to medical records/ real-time documentation
- Discharge planning (collaboration, decision making, referral)
- Interaction with caregiver(s)
- Hours of service

Team

What are your thoughts on the overall capability of the physiotherapy team in providing the proposed home hospital service?

- In terms of patient load
- In terms of clinical and soft skills

Any other comments

Is there anything else you think is important to consider in the preparation for physiotherapy involvement in a hospital at home service for people with cardiorespiratory medical and post-surgical conditions?
